# Supplementary material for: The role of cholesterol in invasion and growth of malaria parasites
Source: Front Cell Infect Microbiol. 2022 Sep 16;12:984049. doi: 10.3389/fcimb.2022.984049 (PMC9522969; doi:10.3389/fcimb.2022.984049)
Supplement: Supplementary file 1 [file Table_1.xlsx]

## Sheet: Sheet1
Table 1
Putative cholesterol binding proteins of Plasmodium falciparum.Note that in most cases cholesterol binding has not been shown biochemically and is inferred by homology only
Protein	Gene ID (Previous Gene ID)	Expression (a)	Conserved (b)	Essential (c)	Phenotype of mutant (d)	References
Fam A	PF3D7_1463500 (PF14_0607)	unknown	All Plasmodium	No (asexual)	ND	Frech and Chen, 2013; Fougère et al., 2016
NCR1	PF3D7_0107500 (PFA0375c)	liver stage, asexual (trophozoite, schizont), very low gametocytes, ookinetes, sporozoites	All Plasmodium	Yes (asexual)	lethal	Istvan et al., 2019
ABCG2	PF3D7_1426500 (PF14_0244)	female gametocytes (low expression male)	All Plasmodium	No (asexual)	Decreased cholesteryl esters, diacylglycerols and triacylglycerols in gametocytes	Tran et al., 2014
Oxysterol binding protein (putative)	PF3D7_1131800 (PF11_0327)	liver stage, asexual stage (trophozoite, schizont), gametocytes (male, female), ookinete	All Plasmodium	No (asexual)	ND	none
phosphatidylcholine-sterol acyltransferase, putative	PF3D7_0629300 (PFF1420w)	liver stage, asexual stage (trophzoite, schizont), oocyst, sprozoite (injected)	All Plasmodium	No (asexual)	Delayed egress from PV in liver stage	Burda et al., 2015
PFA66	PF3D7_0113700 (PFA0660w)	asexual stage	Laverania	No (asexual)	Malformation of knobs	Petersen et al., 2016; Diehl et al., 2021
a-as determined using the Malaria Cell Atlas (https://www.sanger.ac.uk/tool/mca/mca/)
b-as determined using PlasmoDB
c-as listed on PlasmoDB
d-ND-not determined
NB: In most cases formal cholesterol binding has not been shown and is inferred by homology only.
References:
Burda, P.-C., Roelli, M. A., Schaffner, M., Khan, S. M., Janse, C. J., and Heussler, V. T. (2015). A Plasmodium phospholipase is involved in disruption of the liver stage parasitophorous vacuole membrane. PLoS Pathog. 11, e1004760. doi: 10.1371/journal.ppat.1004760.
Diehl, M., Roling, L., Rohland, L., Weber, S., Cyrklaff, M., Sanchez, C. P., et al. (2021). Co-chaperone involvement in knob biogenesis implicates host-derived chaperones in malaria virulence. PLoS Pathog. 17, e1009969. doi: 10.1371/journal.ppat.1009969.
Fougère, A., Jackson, A. P., Bechtsi, D. P., Braks, J. A. M., Annoura, T., Fonager, J., et al. (2016). Variant Exported Blood-Stage Proteins Encoded by Plasmodium Multigene Families Are Expressed in Liver Stages Where They Are Exported into the Parasitophorous Vacuole. PLoS Pathog. 12, e1005917. doi: 10.1371/journal.ppat.1005917.
Frech, C., and Chen, N. (2013). Variant surface antigens of malaria parasites: functional and evolutionary insights from comparative gene family classification and analysis. BMC Genomics 2013 14:1 14, 427. doi: 10.1186/1471-2164-14-427.
Istvan, E. S., Das, S., Bhatnagar, S., Beck, J. R., Owen, E., Llinas, M., et al. (2019). Plasmodium Niemann-Pick type C1-related protein is a druggable target required for parasite membrane homeostasis. Elife 8, e40529. doi: 10.7554/elife.40529.
Petersen, Wiebke, Engels, S., Zhang, Q., Ingmundson, A., Rug, M., et al. (2016). J-dot targeting of an exported HSP40 in Plasmodium falciparum-infected erythrocytes. International Journal for Parasitology. doi: 10.1016/j.ijpara.2016.03.005.
Tran, P. N., Brown, S. H. J., Mitchell, T. W., Matuschewski, K., Mcmillan, P. J., Kirk, K., et al. (2014). A female gametocyte-specific ABC transporter plays a role in lipid metabolism in the malaria parasite. Nat Commun 5 SP-, 4773. doi: 10.1038/ncomms5773.
